# Supplementary material
Source: PubMed Central journal article supplement (PMC4078856)
Supplement: 1407190111_pnas.201407190SI.pdf [file 1407190111_pnas.201407190SI.pdf]

# Supporting Information

Steinberg et al. 10.1073/pnas.1407190111

**Table S1. Mean  $\pm$  SE perch height, proportion of time spent signaling, maximum head-bob amplitude, and number of bobs per display for each island**

| Treatment    | Island name | Perch height, cm     | Proportion of time signaling | Maximum amplitude, mm | Bobs/display      | Visits | Hours |
|--------------|-------------|----------------------|------------------------------|-----------------------|-------------------|--------|-------|
| Control      | Barge       | 27.4 $\pm$ 2.5 (30)  | 0.05 $\pm$ 0.01 (39)         | 21.6 $\pm$ 5.7 (4)    | 5.0 $\pm$ 1.2 (4) | 4      | 11.5  |
|              | Buddy       | 30.0 $\pm$ 3.5 (34)  | 0.02 $\pm$ 0.01 (39)         | 19.5 $\pm$ 1.8 (4)    | 8.0 $\pm$ 1.6 (4) | 8      | 17    |
|              | Five        | 46.0 $\pm$ 6.8 (25)  | 0.05 $\pm$ 0.01 (26)         | 19.4 $\pm$ 1.7 (6)    | 7.3 $\pm$ 0.5 (6) | 4      | 8.5   |
|              | X3          | 31.8 $\pm$ 3.4 (35)  | 0.04 $\pm$ 0.01 (36)         | 20.0 $\pm$ 3.2 (6)    | 5.1 $\pm$ 0.6 (6) | 5      | 12.5  |
| Experimental | One         | 65.3 $\pm$ 6.5 (25)  | 0.03 $\pm$ 0.01 (25)         | 9.4 $\pm$ 1.9 (4)     | 6.4 $\pm$ 0.7 (4) | 6      | 10.5  |
|              | One Pine    | 53.1 $\pm$ 3.8 (30)  | 0.03 $\pm$ 0.01 (32)         | 21.4 $\pm$ 2.5 (6)    | 6.8 $\pm$ 0.6 (6) | 5      | 10.5  |
|              | Six         | 102.9 $\pm$ 14.5 (8) | 0.02 $\pm$ 0.01 (8)          | 9.3 $\pm$ 4.8 (2)     | 6.3 $\pm$ 2.8 (2) | 9      | 16    |
|              | X0          | 61.1 $\pm$ 7.2 (12)  | 0.04 $\pm$ 0.02 (12)         | 11.7 $\pm$ 3.6 (4)    | 6.1 $\pm$ 1.5 (4) | 2      | 5.5   |
|              | Y5          | 101.9 $\pm$ 8.4 (23) | 0.02 $\pm$ 0.01 (23)         | 12.8 $\pm$ 3.5 (3)    | 6.0 $\pm$ 2.0 (3) | 6      | 13    |

Sample sizes are given in parentheses. The number of visits to each island and number of total hours spent on each island during the filming of spontaneous head-bob displays also are provided.
